# Supplementary material for: Development of a Mobile Phone App to Support Self-Monitoring of Emotional Well-Being: A Mental Health Digital Innovation
Source: PubMed Central journal article supplement (PMC5143469; doi:10.2196/mental.6202), 2016-11-23
Supplement: mental_v3i4e49_app1.pdf [file mental_v3i4e49_app1.pdf]

Table 1. Details on 3 forms of data (Automatic, Experience sampling, and Psychological surveys) collected from MoodPrism.

| Automated data collection |                                                                                                                                                                                                                                                                                                                                      | Experience sampling items                                                                                                                                                                                                                                                                                                                                                                                                                                                                                                                                                                                                |                                                                                                                                                                                                            | Psychological questionnaires                       |                                                                   |                                                    |
|---------------------------|--------------------------------------------------------------------------------------------------------------------------------------------------------------------------------------------------------------------------------------------------------------------------------------------------------------------------------------|--------------------------------------------------------------------------------------------------------------------------------------------------------------------------------------------------------------------------------------------------------------------------------------------------------------------------------------------------------------------------------------------------------------------------------------------------------------------------------------------------------------------------------------------------------------------------------------------------------------------------|------------------------------------------------------------------------------------------------------------------------------------------------------------------------------------------------------------|----------------------------------------------------|-------------------------------------------------------------------|----------------------------------------------------|
| Source                    | Data (downloaded once every 24 h, subject to user permissions)                                                                                                                                                                                                                                                                       | Target and questions                                                                                                                                                                                                                                                                                                                                                                                                                                                                                                                                                                                                     | Source                                                                                                                                                                                                     | Questionnaire                                      | Purpose                                                           | Source                                             |
| Facebook                  | For each post in history (up to last 50):<br>- Date and time of post<br>- Length of message (characters)<br>- Number of words in message<br>- Number of positive, negative, self-pronoun, other-pronoun words<br>- Number of likes<br>- Number of comments<br>- Number of tags<br>- City and postcode (if available) of where posted | <b>Emotional well-being</b><br><br>How were you feeling just before you were prompted by this app? (rated on a 5-point scale from “not at all” to “extremely”)<br><br>1. Nervous, anxious, or on edge<br>2. Not able to stop or control worrying<br>3. Little interest or pleasure doing things<br>4. Feeling down, depressed, or hopeless<br>5. Active or alert<br>6. Negative or unpleasant<br>7. Positive or pleasant<br>8. In control of what I'm doing<br>9. Socially connected and supported<br>10. Motivated, engaged, and interested<br>11. Life is meaningful and with purpose<br>12. Feeling good about myself | Drawn from PHQ-4 [59];<br>3 dimensional models of affect [60,61];<br>The WHO <sup>a</sup> emotional well-being scales (WHO-5) [62]; positive health literature [55]; single item self-esteem measures [63] | <b>At baseline only</b>                            |                                                                   |                                                    |
|                           |                                                                                                                                                                                                                                                                                                                                      |                                                                                                                                                                                                                                                                                                                                                                                                                                                                                                                                                                                                                          |                                                                                                                                                                                                            | Demographics                                       | Sample description or Potential moderator or confounding variable | Custom developed                                   |
|                           |                                                                                                                                                                                                                                                                                                                                      |                                                                                                                                                                                                                                                                                                                                                                                                                                                                                                                                                                                                                          |                                                                                                                                                                                                            | Life event scale                                   | Potential moderator or confounding variable                       | [69]                                               |
|                           |                                                                                                                                                                                                                                                                                                                                      |                                                                                                                                                                                                                                                                                                                                                                                                                                                                                                                                                                                                                          |                                                                                                                                                                                                            | Multidimensional scale of perceived social support | Potential moderator or confounding variable                       | [70]                                               |
|                           |                                                                                                                                                                                                                                                                                                                                      |                                                                                                                                                                                                                                                                                                                                                                                                                                                                                                                                                                                                                          |                                                                                                                                                                                                            | Social desirability scale                          | Assessment of reliable responding                                 | [71]                                               |
|                           |                                                                                                                                                                                                                                                                                                                                      |                                                                                                                                                                                                                                                                                                                                                                                                                                                                                                                                                                                                                          |                                                                                                                                                                                                            | IPIP                                               | Potential moderator or confounding variable                       | [72]                                               |
|                           |                                                                                                                                                                                                                                                                                                                                      |                                                                                                                                                                                                                                                                                                                                                                                                                                                                                                                                                                                                                          |                                                                                                                                                                                                            | Rosenberg's self-esteem                            | Potential moderator or confounding variable                       | [73]                                               |
|                           |                                                                                                                                                                                                                                                                                                                                      |                                                                                                                                                                                                                                                                                                                                                                                                                                                                                                                                                                                                                          |                                                                                                                                                                                                            | Barcelona music rewards scale                      | Potential moderator or confounding variable                       | [74]                                               |
|                           |                                                                                                                                                                                                                                                                                                                                      |                                                                                                                                                                                                                                                                                                                                                                                                                                                                                                                                                                                                                          |                                                                                                                                                                                                            | Technology use survey                              | Potential moderator or confounding variable                       | Custom developed except for 1 item drawn from [75] |
|                           |                                                                                                                                                                                                                                                                                                                                      |                                                                                                                                                                                                                                                                                                                                                                                                                                                                                                                                                                                                                          |                                                                                                                                                                                                            | <b>At baseline and 1 month follow up</b>           |                                                                   |                                                    |

|               |                                                                                                                                                                                                                                                                                                                                                                                                                                                                                                                                                                                                                                                                                            |                                                                                                                                                                                                                                                                                                                                                                                                                                                                                                                                                                                                                                                                                             |                                                                          |                                      |                                             |                                                                                                |
|---------------|--------------------------------------------------------------------------------------------------------------------------------------------------------------------------------------------------------------------------------------------------------------------------------------------------------------------------------------------------------------------------------------------------------------------------------------------------------------------------------------------------------------------------------------------------------------------------------------------------------------------------------------------------------------------------------------------|---------------------------------------------------------------------------------------------------------------------------------------------------------------------------------------------------------------------------------------------------------------------------------------------------------------------------------------------------------------------------------------------------------------------------------------------------------------------------------------------------------------------------------------------------------------------------------------------------------------------------------------------------------------------------------------------|--------------------------------------------------------------------------|--------------------------------------|---------------------------------------------|------------------------------------------------------------------------------------------------|
| Twitter       | <p>For each tweet in timeline (up to last 50):</p> <ul style="list-style-type: none"> <li>- Date and time of tweet</li> <li>- Tweet client site or software or app used</li> <li>- Length of message (characters)</li> <li>- Number of words in message</li> <li>- Number of positive, negative, self-pronoun, other-pronoun words</li> <li>- Number of retweets</li> <li>- Number of favourites</li> </ul> <p>For each song in the user's music library</p> <ul style="list-style-type: none"> <li>- Song Title</li> <li>- Genre</li> <li>- Artist</li> <li>- Album</li> <li>- Last Played</li> <li>- Play count</li> <li>- Rating</li> <li>- Release date</li> <li>- Duration</li> </ul> | <p><b>Event-related experiences</b></p> <p>What's the most positive thing that's happened to you in the past 24 h?</p> <ul style="list-style-type: none"> <li>• Nothing positive happened</li> <li>• Positive social experience (with friends, family, strangers, etc)</li> <li>• Obtained material item (bought or won something, received a gift, etc)</li> <li>• Positive experience at work or school</li> <li>• Positive experience outside of work or school</li> <li>• Positive health or fitness experience</li> <li>• A happy occasion (e.g., birthday, wedding, holiday)</li> <li>• Other (with option to type in detail)</li> </ul> <p>What's the most negative thing that's</p> | <p>Items modified from various stressor event questionnaires [64-68]</p> | Emotional self-awareness scale       | Evaluation of emotional awareness change    | [76]                                                                                           |
|               |                                                                                                                                                                                                                                                                                                                                                                                                                                                                                                                                                                                                                                                                                            |                                                                                                                                                                                                                                                                                                                                                                                                                                                                                                                                                                                                                                                                                             |                                                                          | Warwick Edinburg well-being scale    | Evaluation of well-being change             | [77]                                                                                           |
|               |                                                                                                                                                                                                                                                                                                                                                                                                                                                                                                                                                                                                                                                                                            |                                                                                                                                                                                                                                                                                                                                                                                                                                                                                                                                                                                                                                                                                             |                                                                          | PHQ-9 <sup>c</sup>                   | Evaluation of well-being change             | [78]                                                                                           |
|               |                                                                                                                                                                                                                                                                                                                                                                                                                                                                                                                                                                                                                                                                                            |                                                                                                                                                                                                                                                                                                                                                                                                                                                                                                                                                                                                                                                                                             |                                                                          | GAD-7 <sup>d</sup>                   | Evaluation of well-being change             | [79]                                                                                           |
|               |                                                                                                                                                                                                                                                                                                                                                                                                                                                                                                                                                                                                                                                                                            |                                                                                                                                                                                                                                                                                                                                                                                                                                                                                                                                                                                                                                                                                             |                                                                          | Mental health literacy questionnaire | Evaluation of mental health literacy change | Vignettes adapted from [80]<br><br>Additional questions drawn from <i>beyond blue</i> website. |
|               |                                                                                                                                                                                                                                                                                                                                                                                                                                                                                                                                                                                                                                                                                            |                                                                                                                                                                                                                                                                                                                                                                                                                                                                                                                                                                                                                                                                                             |                                                                          | Brief resilience scales              | Evaluation of mental health literacy change | [81]                                                                                           |
|               |                                                                                                                                                                                                                                                                                                                                                                                                                                                                                                                                                                                                                                                                                            |                                                                                                                                                                                                                                                                                                                                                                                                                                                                                                                                                                                                                                                                                             |                                                                          | Coping self-efficacy scale           | Evaluation of mental health literacy change | [82]                                                                                           |
|               |                                                                                                                                                                                                                                                                                                                                                                                                                                                                                                                                                                                                                                                                                            |                                                                                                                                                                                                                                                                                                                                                                                                                                                                                                                                                                                                                                                                                             |                                                                          | <b>At 1 month follow up only</b>     |                                             |                                                                                                |
| Music library |                                                                                                                                                                                                                                                                                                                                                                                                                                                                                                                                                                                                                                                                                            |                                                                                                                                                                                                                                                                                                                                                                                                                                                                                                                                                                                                                                                                                             |                                                                          |                                      |                                             |                                                                                                |

|  |  |                                                                                                                                                                                                                                                                                                                                                                                                                                                                                                                                                                                                                                                                                                                                                                  |  |                        |                           |                                                                                    |
|--|--|------------------------------------------------------------------------------------------------------------------------------------------------------------------------------------------------------------------------------------------------------------------------------------------------------------------------------------------------------------------------------------------------------------------------------------------------------------------------------------------------------------------------------------------------------------------------------------------------------------------------------------------------------------------------------------------------------------------------------------------------------------------|--|------------------------|---------------------------|------------------------------------------------------------------------------------|
|  |  | <p>happened to you in the past 24 hours?</p> <ul style="list-style-type: none"> <li>• Nothing negative happened</li> <li>• Negative social experience (with family, friends, strangers, etc)</li> <li>• Loss of valued material item (misplaced, theft, etc)</li> <li>• Negative experience at school or work</li> <li>• Negative experience outside of work or school</li> <li>• Personal health problems (illness, injury, etc)</li> <li>• Health problems of someone close to you (illness, injury, death, etc)</li> <li>• Other (with option to type in detail)</li> </ul> <p>Followed by options for all (except "nothing"):</p> <p>How positive or negative was it?</p> <ul style="list-style-type: none"> <li>• Slightly</li> <li>• Moderately</li> </ul> |  | Feedback questionnaire | Assessment of app quality | Custom developed (although broadly consistent with factors of MARS <sup>b</sup> ). |
|--|--|------------------------------------------------------------------------------------------------------------------------------------------------------------------------------------------------------------------------------------------------------------------------------------------------------------------------------------------------------------------------------------------------------------------------------------------------------------------------------------------------------------------------------------------------------------------------------------------------------------------------------------------------------------------------------------------------------------------------------------------------------------------|--|------------------------|---------------------------|------------------------------------------------------------------------------------|

|  |  |                                                                                                                                                                                                                                                                                                                                                                                                                                                                                                                                                                                                                                                                                                        |  |  |  |  |
|--|--|--------------------------------------------------------------------------------------------------------------------------------------------------------------------------------------------------------------------------------------------------------------------------------------------------------------------------------------------------------------------------------------------------------------------------------------------------------------------------------------------------------------------------------------------------------------------------------------------------------------------------------------------------------------------------------------------------------|--|--|--|--|
|  |  | <ul style="list-style-type: none"> <li>• Very</li> <li>• Extremely</li> </ul> <p><b>Context</b></p> <p>Where are you? (drop-down selections)</p> <ul style="list-style-type: none"> <li>• At home</li> <li>• At someone else's place</li> <li>• At work, uni, or school</li> <li>• At a leisure venue (eg, cinema, shops, park, sporting venue)</li> <li>• Travelling or commuting</li> <li>• Other (with option to type in detail)</li> </ul> <p>Who's with you? (Drop-down selections)</p> <ul style="list-style-type: none"> <li>• I'm alone</li> <li>• Mainly friends</li> <li>• Mainly family or my partner</li> <li>• Mainly work colleagues</li> <li>• Mainly strangers</li> </ul> <p>Other</p> |  |  |  |  |
|--|--|--------------------------------------------------------------------------------------------------------------------------------------------------------------------------------------------------------------------------------------------------------------------------------------------------------------------------------------------------------------------------------------------------------------------------------------------------------------------------------------------------------------------------------------------------------------------------------------------------------------------------------------------------------------------------------------------------------|--|--|--|--|

<sup>a</sup>WHO: World Health Organization.

<sup>b</sup>MARS: Mobile Application Rating Scale.

<sup>c</sup>PHQ-9: Patient Health Questionnaire-9

<sup>d</sup>GAD-7: General Anxiety Disorder scale-7

55. Keyes, C.L., Mental illness and/or mental health? Investigating axioms of the complete state model of health. *Journal of Consulting and Clinical Psychology* 2005;73(3): p. 539-548.
59. Kroenke, K., et al., An ultra-brief screening scale for anxiety and depression: the PHQ-4. *Psychosomatics* 2009;50(6): p. 613-21.
60. Mehrabian, A., Russell, J.A. *An approach to environmental psychology* (1 ed.). Cambridge, Mass.: MIT Press, 1974.
61. Russell, J. A. A circumplex model of affect. *Journal of Personality and Social Psychology* 1980;39:1161-1178.
62. Bech, P., O.R. Kjoller, and N.K. Rasmussen, Measuring well-being rather than the absence of distress symptoms: a comparison of the SF-36 Mental Health subscale and the WHO-Five Well-Being Scale. *International J Methods Psychiatr Res*, 2003. 12(2): p. 85-91.
63. Robins, R. W., Hendin, H. M., Trzesniewski, K. H. Measuring global self-esteem: Construct validation of a single-item measure and the Rosenberg Self-Esteem Scale. *Personality and Social Psychology Bulletin* 2001;27:151-161.
64. Cheng, C. Assessment of major life events for Hong Kong adolescents: The Chinese adolescent life event scale. *American Journal of Community Psychology* 1997;25(1):17-33.
65. Coddington, R. D. The significance of life events as etiologic factors in the diseases of children—II. A study of a normal population. *Journal of Psychosomatic Research* 1972; 16(3):205-213.
66. Newcomb, M. D., Huba, G. J., Bentler, P. M. A multidimensional assessment of stressful life events among adolescents: Derivation and correlates. *Journal of Health and Social Behavior* 1981;22:400-415.
67. Swearingen, E. M., Cohen, L. H. Measurement of adolescents' life events: The junior high life experiences survey. *American Journal of Community Psychology* 1985;13(1):69-85.
68. Waaktaar, T., Borge, A. I. H., Fundingsrud, H. P., Christie, H. J., Torgersen, S. The role of stressful life events in the development of depressive symptoms in adolescence—A longitudinal community study. *Journal of adolescence* 2004;27(2):153-163.
69. Holmes, T.H., Rahe, R.H. The Social Readjustment Rating Scale. *J Psychosom Res* 1967;11(2): 213-8
70. Zimet, G.D., et al., The Multidimensional Scale of Perceived Social Support. *Journal of Personality Assessment* 1988;52(1):30-41.
71. Reynolds, W.M. Development of reliable and valid short forms of the Marlowe-Crowne social desirability scale. *Journal of Clinical Psychology* 2006;38(1):119-125.
72. Donnellan, M.B., Oswald, F., Baird, B., Lucas, R.E., et al [The Mini-IPIP Scales: Tiny-Yet-Effective Measures of the Big Five Factors of Personality](#). *Psychological Assessment*, 2006 ;18(2), 192-203
73. Rosenberg, M. *Society and the adolescent self-image*. Princeton, NJ: Princeton University Press, 1965.
74. Mas-Herrero, E. et al. Individual differences in music reward experiences. *Music Perception* 2013; 31(2):118-138.
75. Young and Well Cooperative Research Centre. 2016-06-14. [URL:http://www.youngandwellcrc.org.au](http://www.youngandwellcrc.org.au) (Accessed: 2016-06-14. ([Archived by WebCite® at http://www.webcitation.org/6iGyrSPAQ](#)))
76. Kauer, S.D. et al. Self-monitoring Using Mobile Phones in the Early Stages of Adolescent Depression: Randomized Controlled Trial. *Journal of Medical Internet Research* 2012;14(3):e67

77. Tennant, R. et al The Warwick-Edinburgh Mental Well-being Scale (WEMWBS): Development and UK validation. *Health and Quality of Life Outcomes* 2007;5:63
78. Kroenke K, Spitzer RL, Williams JBW. The PHQ-9: Validity of a brief depression severity measure. *J Gen Intern Med* 2001;16: 606-613.
79. Spitzer RL, Kroenke K, Williams JBW, Löwe B. A brief measure for assessing generalized anxiety disorder: the GAD-7. *Arch Intern Med* 2006;166:1092-1097.
80. Reavley, N.J., Morgan, A.J, Jorm, F. F., Development of scales to assess mental health literacy relating to recognition of and interventions for depression, anxiety disorders and schizophrenia/psychosis. *Australian and New Zealand Journal of Psychiatry* 2014; 48(1):61-9.
81. Smith, B.W. et al The Brief Resilience Scale: Assessing the ability to bounce back. *International Journal of Behavioral Medicine* 2008;15:194-200.
82. Chesney, M.A., et al. A validity and reliability study of the coping self-efficacy scale. *Br J Health Psychol* 2006;11(3): 421-437
